# Supplementary material
Source: publisher figshare collection journal article supplement (https://frontiersin.figshare.com/ndownloader/files/23353871)
Supplement: Supplementary file [file 23353871]

# Comparative Genomic Analysis Reveals the Metabolism and Evolution of the Thermophilic Archaeal Genus *Metallosphaera*

Pei Wang<sup>1,2,§</sup>, LiangZhi Li<sup>3,4,§</sup>, YaLing Qing<sup>1,2</sup>, ZongLin Liang<sup>1,2</sup>, XiuTong Li<sup>1,2</sup>, HuaQun Yin<sup>3,4</sup>, LiJun Liu<sup>5</sup>, Shuang-Jiang Liu<sup>1,2\*</sup> and Cheng-Ying Jiang<sup>1,2\*</sup>

<sup>1</sup>State Key Laboratory of Microbial Resources, Institute of Microbiology, Chinese Academy of Sciences, Beijing 100101, China

<sup>2</sup>University of Chinese Academy of Sciences, Beijing 100049, China

<sup>3</sup>School of Resources Processing and Bioengineering, Central South University, Changsha, China

<sup>4</sup>Key Laboratory of Biometallurgy of Ministry of Education, Central South University, Changsha

<sup>5</sup>Department of Pathogen Biology, School of Basic Medical Science, Xi'an Medical University, Xi'an 710021, Shaanxi Province, China

§ P. Wang. and LZ. Li. contributed equally

## \* Correspondence:

Cheng-Ying Jiang

jiangcy@im.ac.cn

Shuang-Jiang Liu

liusj@im.ac.cn

## Supplementary Figure

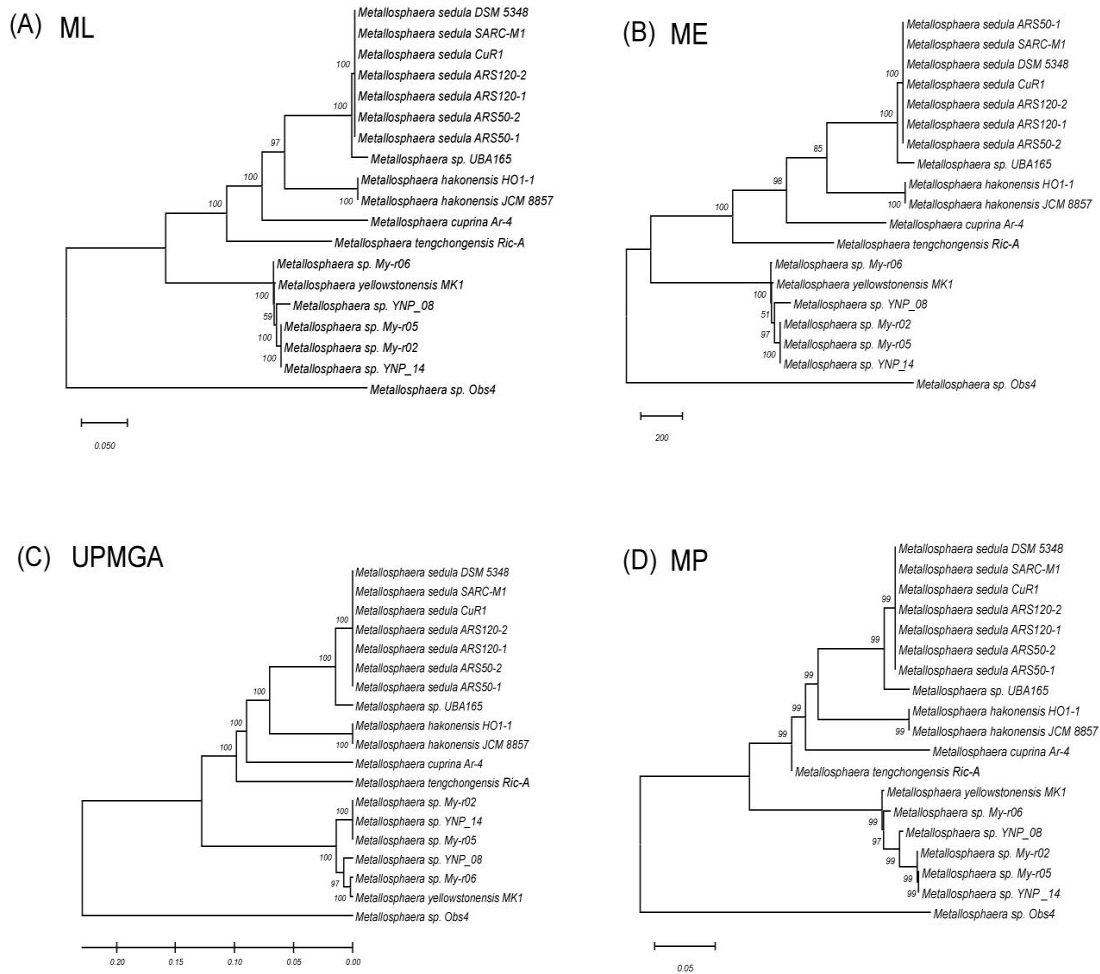

**Fig. S1**

Phylogenetic tree of *Metallosphaera* spp. with (A) Maximum Likelihood (ML) method; (B) Minimum Evolution (ME) method; (C) UPGMA method; (D) Maximum Parsimony (MP) method based on 16S rRNA sequences. Bootstrap values are indicated at each node based on a total of 1,000 bootstrap replicates.

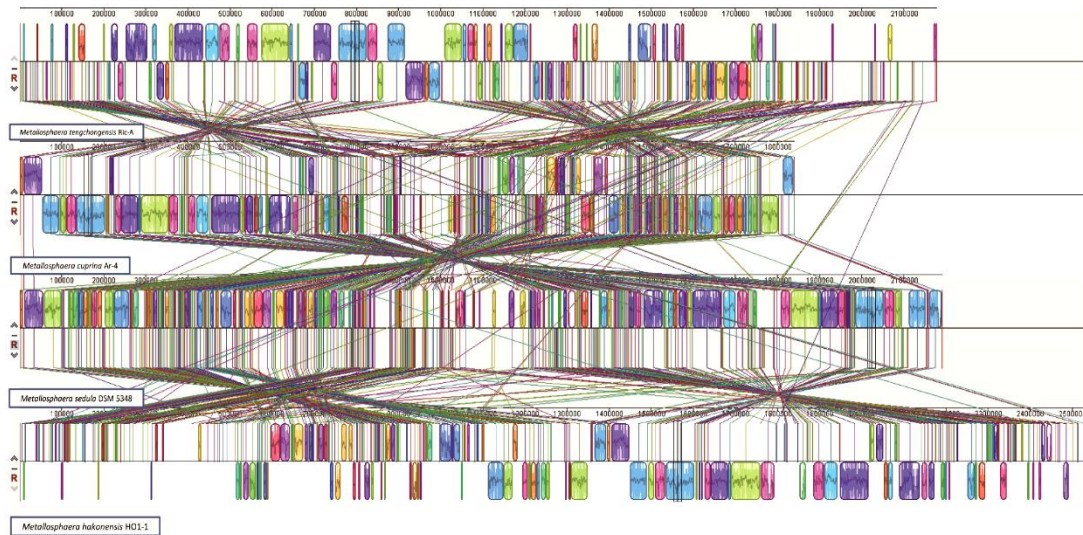

**Fig. S2**

Whole genome alignment with Mauve showing syntenic blocks between type strains *M. tengchongensis* Ric-A, *M. cuprina* Ar-4, *M. sedula* DSM 5348, and *M. hakonensis* HO1-1 (from top to bottom).

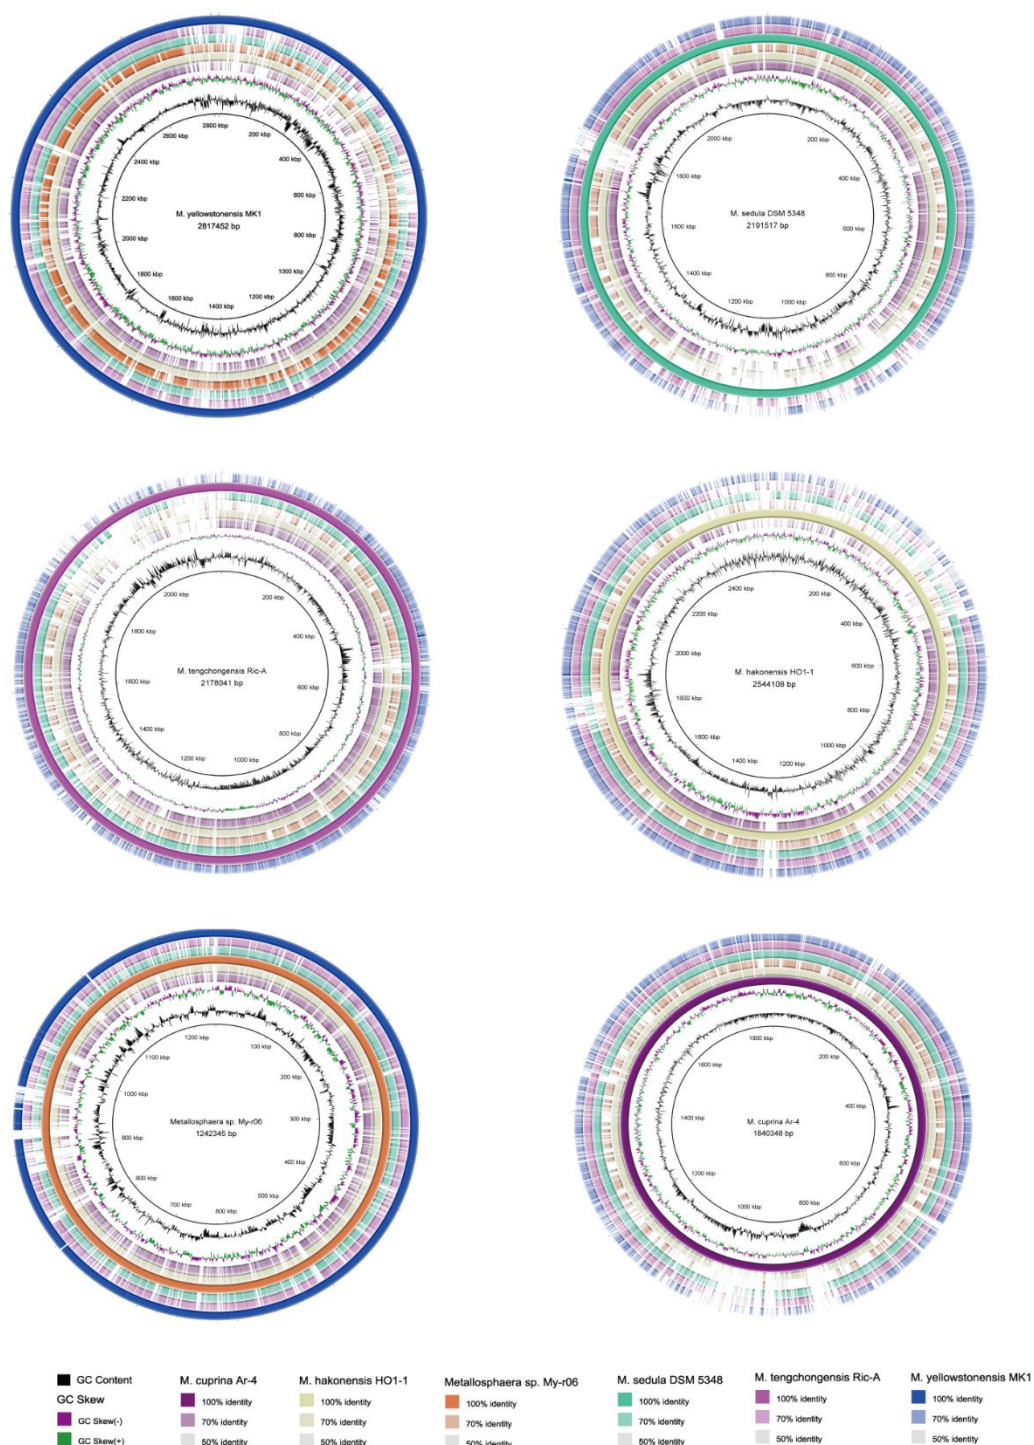

**Fig. S3**

BlastN-based whole genome comparison of strains *M. cuprina* Ar-4, *M. hakonensis* HO1-1, *Metallosphaera* sp. My-r06, *M. sedula* DSM 5348, *M. tengchongensis* Ric-A, and *M. yellowstonensis* MK1 (from inside to outside) with BRIG, and these strains were used as reference, respectively. GC content and GC skew (inner ring 1 and 2) of each genome were also indicated.

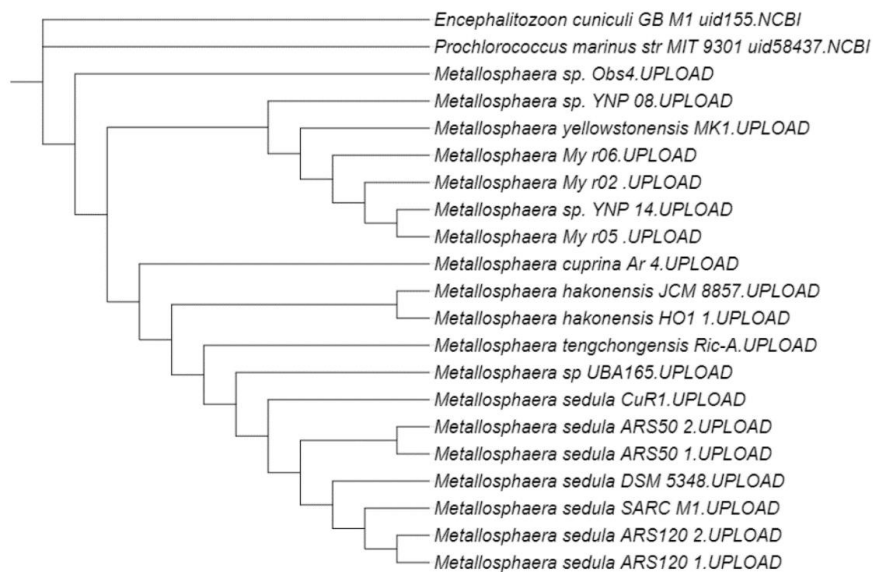

**Fig. S4**

Phylogenetic tree of *Metallosphaera* spp. rooted by *Encephalitozoon cuniculi* GB M1 and *Prochlorococcus marinus* MIT 9301 based on whole genome sequences using CVTree 3.

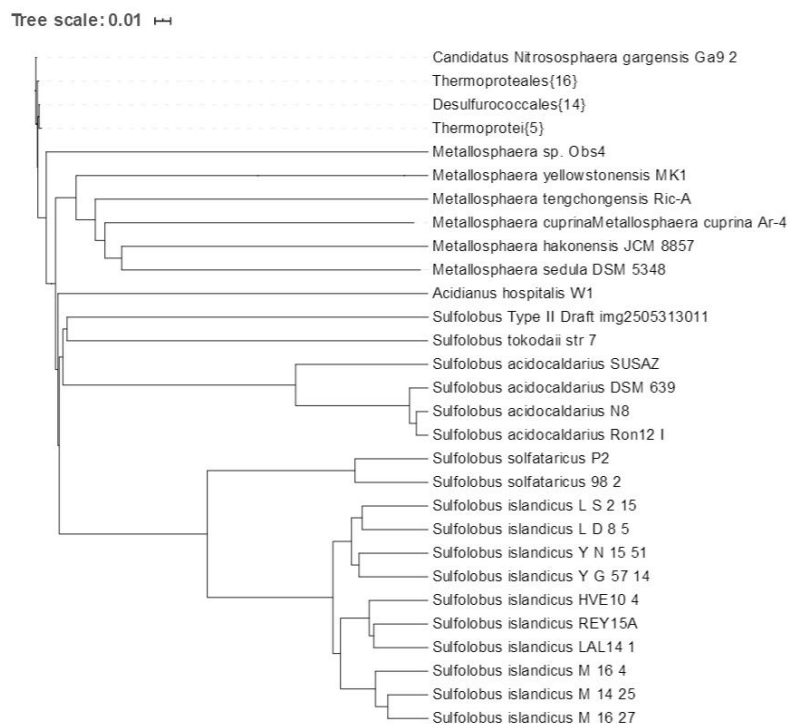

**Fig. S5**

Phylogenetic tree of *Metallosphaera* spp. and other members of Sulfolobales based on whole genome sequences using CVTree 3.

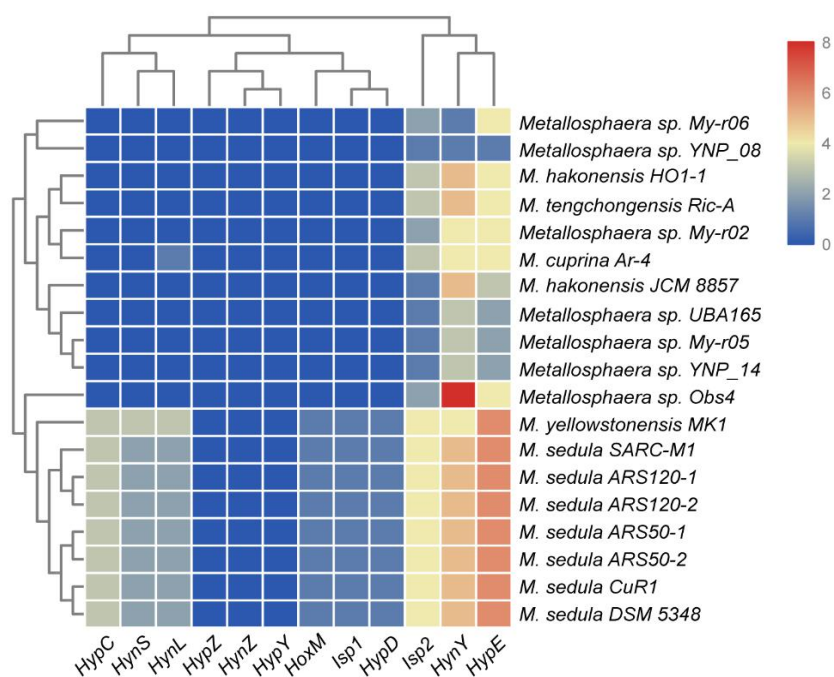

**Fig. S6**

Heat map showing the distribution and number of genes encoding putative hydrogenase related proteins in different *Metallosphaera* strains.

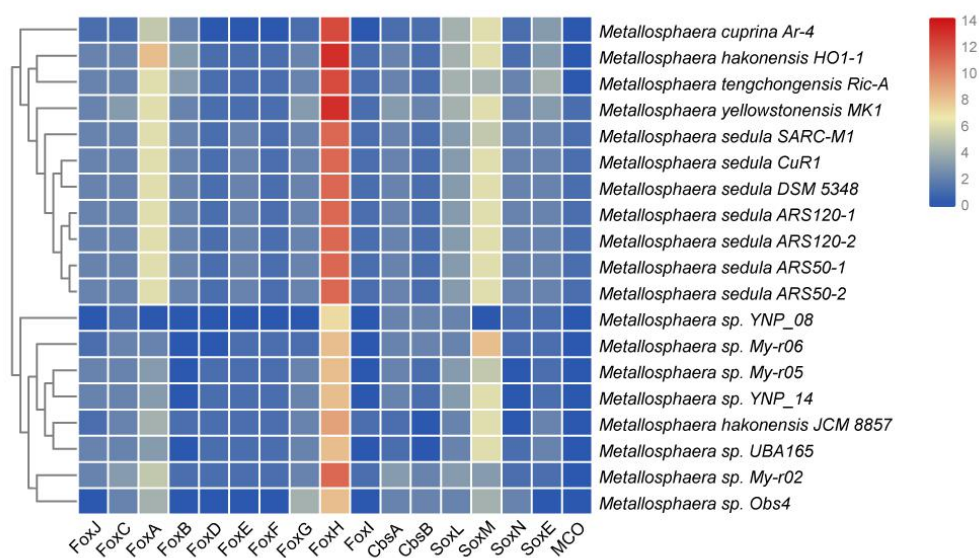

**Fig. S7**

Heat map showing the distribution and numbers of genes encoding putative proteins involved in iron oxidation in different *Metallosphaera* strains.



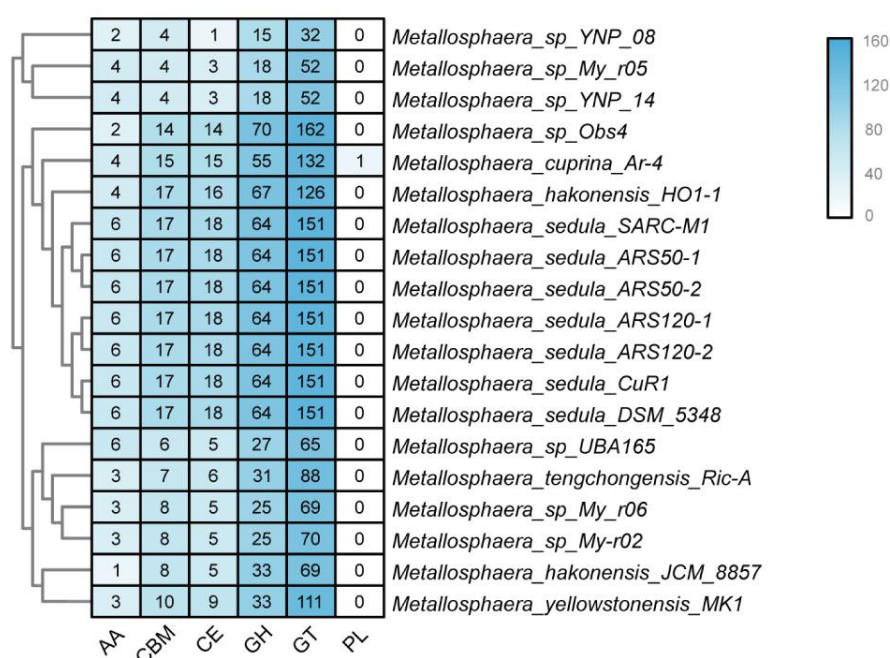

**Fig. S8**

Heat map showing the distribution and numbers of genes encoding carbohydrate active enzymes (CAZymes) in different *Metallosphaera* strains. Abbreviations in the chart: *AA*, auxiliary activities proteins; *CBM*, carbohydrate-binding molecules; *CE*, carbohydrate esterases; *GH*, glycoside hydrolases; *GT*, glycosyltransferases; *PL*, polysaccharide lyases.

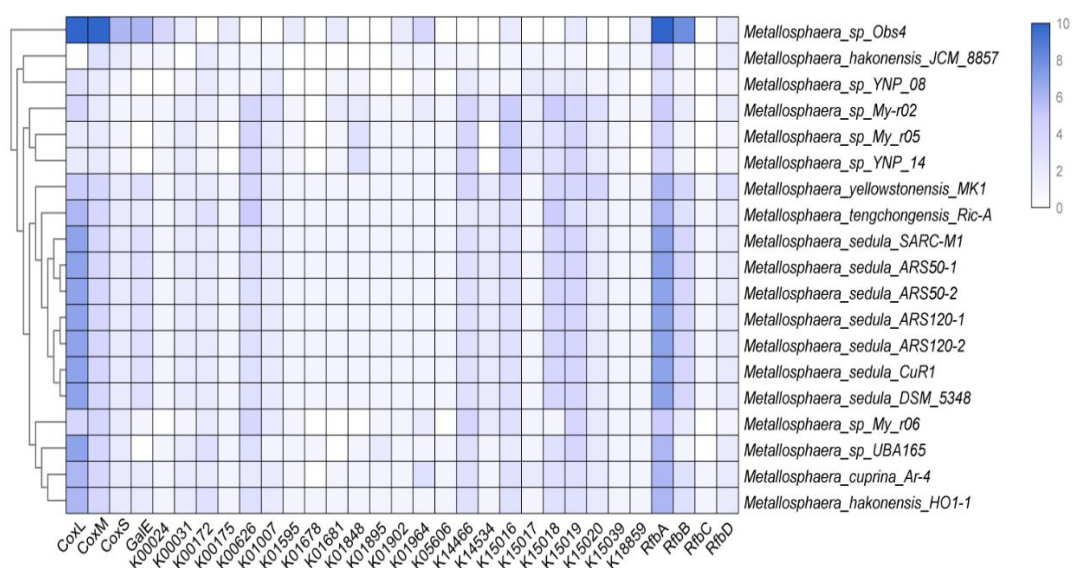

**Fig. S9**

Heat map showing the distribution and numbers of genes encoding putative enzymes involved in carbon metabolism in different *Metallosphaera* strains. Abbreviation and KO term descriptions in the chart: *CoxL/M/S*, Carbon monoxide dehydrogenase large/

medium/small chain; *GalE*, UDP-glucose 4-epimerase; *RfbA*, d-TDP-glucose pyrophosphorylase; *RfbB*, d-TDP-glucose 4;6-dehydratase; *RfbC*, d-TDP-4-dehydrorhamnose 3;5-epimerase; *RfbD*, d-TDP-4-dehydrorhamnose reductase; *K01895*, acetyl-CoA synthetase; *K00172*, pyruvate ferredoxin oxidoreductase gamma subunit; *K00626*, acetyl-CoA C-acetyltransferase; *K01681* aconitate hydratase; *K01007*, pyruvate; water dikinase [EC:2.7.9.2]; *K01964* acetyl-CoA/propionyl-CoA carboxylase [EC:6.4.1.2]; *K15016*, enoyl-CoA hydratase; *K15017*, malonyl-CoA/succinyl-CoA reductase; *K01595*, phosphoenolpyruvate carboxylase; *K15039* 3-hydroxypropionate dehydrogenase (NADP+) [EC:1.1.1.298]; *K15018*, 3-hydroxypropionyl-coenzyme A synthetase; *K15019* 3-hydroxypropionyl-coenzyme A dehydratase; *K14534*, -hydroxybutyryl-CoA dehydratase; *K00031*, isocitrate dehydrogenase ; *K00024*, malate dehydrogenase; *K15020* ,acryloyl-coenzyme A reductase; *K14466*, 4-hydroxybutyrate-CoA ligase; *K05606*, methylmalonyl-CoA; *K00175*, 2-oxoglutarate/2-oxoacid ferredoxin oxidoreductase; *K01678*, fumarate hydratase; *K01848* methylmalonyl-CoA mutase; *K18859*, succinate dehydrogenase / fumarate reductase; *K01902*, succinyl-CoA synthetase.

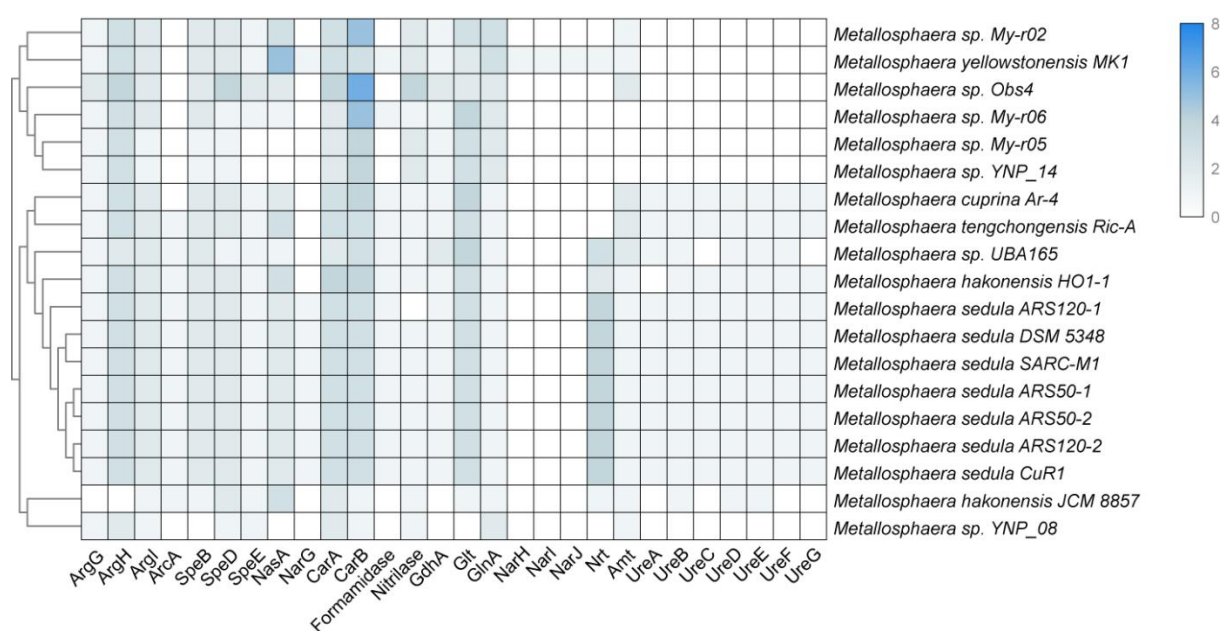

**Fig. S10**

Heat map showing the distribution and numbers of genes encoding putative proteins involved in nitrogen metabolism in different *Metallosphaera* strains. Abbreviation descriptions in the chart: *GdhA*, glutamate dehydrogenase (NAD(P)+) [EC 1.4.1.3]; *GlnA*, glutamine synthetase [EC 6.3.1.2]; *CarA*, carbamoyl-phosphate synthase small subunit [EC 6.3.5.5]; *CarB*, carbamoyl-phosphate synthase large subunit [EC 6.3.5.5]; *NarG*, nitrate reductase/nitrite oxidoreductase, alpha subunit [EC 1.7.5.1; 1.7.99.4];



*NarH*, nitrate reductase/nitrite oxidoreductase, beta subunit [EC 1.7.5.1; 1.7.99.4]; *NarJ*, nitrate reductase delta subunit; *NarI*, nitrate reductase gamma subunit [EC 1.7.5.1; 1.7.99.4]; *Nrt*, nitrate/nitrite transporter; *Amt*, ammonium transporter; *UreAB*, *UreCD*, urease functional subunits; *UreE*, *UreF*, *UreG*, urease accessory proteins; *ArgH*, argininosuccinate lyase; *ArgI*, ornithine carbamoyltransferase; *ArcA*, arginine decarboxylase; *ArgG*, argininosuccinate synthase; *SpeB*, agmatinase; *SpeD*, S-adenosylmethionine decarboxylase; *SpeE*, spermidine synthase.

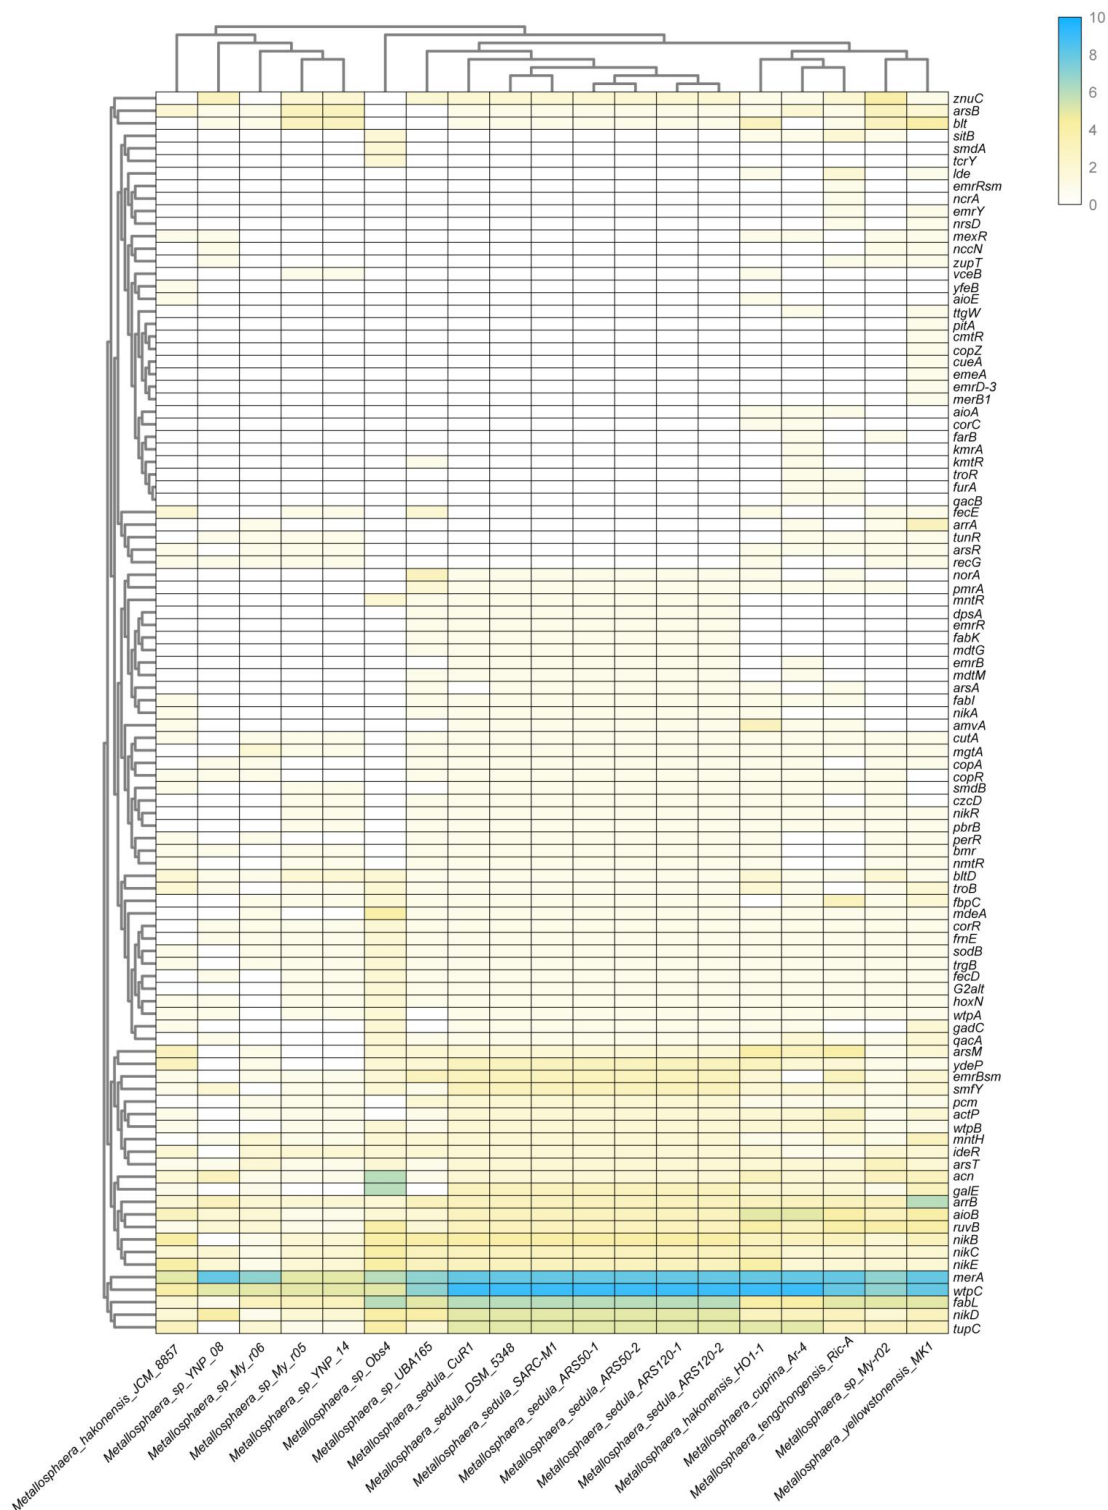

**Fig. S11**

Heat map showing patterns of the distribution and numbers of genes encoding putative proteins involved in heavy metal resistance in different *Metallosphaera* strains.

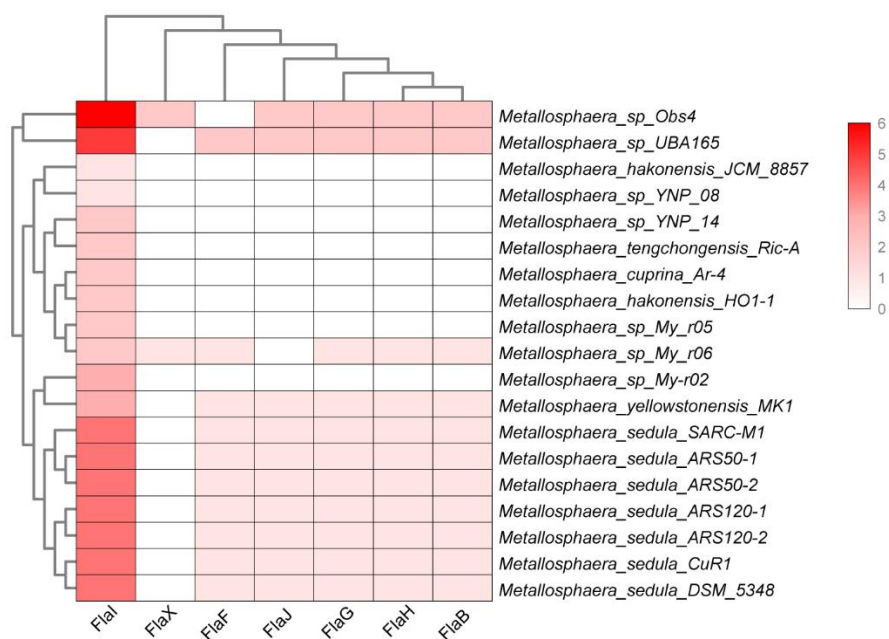

**Fig. S12**

Heat map showing patterns of the distribution and numbers of genes encoding putative proteins involved in flagella biosynthesis in different *Metallosphaera* strains.

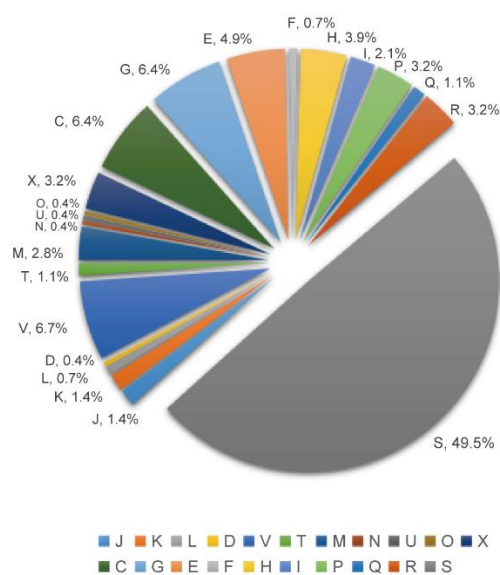

**Fig. S13** The COG proportions of predicted horizontal transferred genes in *Metallosphaera* spp.
